# Supplementary material for: Analysis of fast protein phosphorylation kinetics in single cells on a microfluidic chip
Source: Royal Society of Chemistry journal article supplement (doi:10.1039/c4lc00797b), 2014-11-19
Supplement: c4lc00797b1.pdf [file c4lc00797b1.pdf]

SI Table 1: Integrated processing steps on the microfluidic PLA chip. Flush cycles include washing steps.

| <b>Assay step</b>                                            | <b>Duration</b> | <b>Conditions</b>        |
|--------------------------------------------------------------|-----------------|--------------------------|
| <b>Fibronectin coating</b>                                   | 3 h             | 37°C, 5% CO <sub>2</sub> |
| <b>Cell seeding</b>                                          | ~1 h            | 37°C, 5% CO <sub>2</sub> |
| <b>Cell culture, Starvation</b>                              | 12 h            | 37°C, 5% CO <sub>2</sub> |
| <b>Stimulation, Fixation,<br/>Permeabilization, Blocking</b> | 3 h             | 37°C, 5% CO <sub>2</sub> |
| <b>Primary antibodies</b>                                    | 8 h             | 20°C                     |
| <b>Secondary antibodies</b>                                  | 4 h             | 20°C                     |
| <b>Ligation</b>                                              | 1.5 h           | 32°C                     |
| <b>Amplification, Staining</b>                               | 4 h             | 32°C                     |
